# Supplementary material for: The Aspergillus fumigatus Mucin MsbA Regulates the Cell Wall Integrity Pathway and Controls Recognition of the Fungus by the Immune System
Source: PubMed Central journal article supplement (PMC6584374; doi:10.1128/msphere.00350-19), 2019-06-19
Supplement: mSphere.00350-19-st001.pdf [file mSphere.00350-19-st001.pdf]

| <b>qRT-PCR Oligonucleotides</b> | <b>Sequence</b>                                                |
|---------------------------------|----------------------------------------------------------------|
| Msb2A 5' Fwd                    | 5'-<br>GTAACGCCAGGGTTTTCCCAGTCACGACGAC<br>TATATCATTAGGTAGGC-3' |
| Msb2A 5' Rev                    | 5'-<br>GTGCCTCCTCTCAGACAGAATGGTTTTGATAC<br>CAAAGCGACTGC-3'     |
| Msb2A 3' Fwd                    | 5'-<br>GAGCATTGTTTGAGGCGAATTCCTGATAAACT<br>GAACCCTACGATG -3'   |
| Msb2A 3' Rev                    | 5'-<br>GCGGTTAACAATTTCTCTCTGGAACAGCCAT<br>CGCAAGCATGGGGCTG-3'  |
| PyrG Fwd                        | 5'-ATTCTGTCTGAGAGGAGGCAC-3'                                    |
| PyrG Rev                        | 5'-GAATTCGCCTCAAACAATGCTC-3'                                   |
| <b>qRT-PCR Oligonucleotides</b> | <b>Sequence</b>                                                |
| Afu pkcA Fwd                    | 5'-CCGAAGTTCTGTTGGCTCTC-3'                                     |
| Afu pkcA Rev                    | 5'-CAGAGACCGTAATCGGCAAT-3'                                     |
| Afu mpkA Fwd                    | 5'- GGCCATCAAGAAGGTTACCA -3'                                   |
| Afu mpkA Rev                    | 5'- TGAAATTGTCTGGTCGTGGA-3'                                    |
| Afu rlmA Fwd                    | 5'-GACGCCGATCTCTGCTCTAC-3'                                     |
| Afu rlmA Rev                    | 5'-GGAGTGGGGAAGGTTAGAGG-3'                                     |
| Afu chsA Fwd                    | 5'-CTGGAGTGTGGCTGGTCTCT-3'                                     |
| Afu chsA Rev                    | 5'-GCGTGTGAAAGCAGTATGGA-3'                                     |
| Afu chsB Fwd                    | 5'-GCTCTCCACTGTCGGTCTCT-3'                                     |
| Afu chsB Rev                    | 5'-GGTCGTTGTTGATGGTGTG-3'                                      |
| Afu chsC Fwd                    | 5'-TTGCTGCGAGTTTGTATTCC-3'                                     |
| Afu chsC Rev                    | 5'-GCCAGTAGGATGCCAAAGAG-3'                                     |
| Afu chsE Fwd                    | 5'-TGGTGTTTCGTTGACTTGCTC-3'                                    |
| Afu chsE Rev                    | 5'-TCATCCATCCAACCATTTC-3'                                      |
| Afu agsA Fwd                    | 5'-CCAACACCTGGAAGATGACC-3'                                     |
| Afu agsA Rev                    | 5'-AACACCGACCGATAGAAGGA-3'                                     |
| Afu fksA Fwd                    | 5'-AAGCAATCGAAGCTCAGGAA-3'                                     |
| Afu fksA Rev                    | 5'-ACCAATCCCATAGAGCGAAC-3'                                     |
| Afu gelA Fwd                    | 5'-CACTGGCTACGGTCTTCCTC-3'                                     |
| Afu gelA Rev                    | 5'-CATTGTTGCCGCTAATCTCC-3'                                     |
| Afu msb2A Fwd                   | 5'- ACTCTCTACAACGGAGCAAAC -3'                                  |
| Afu msb2A Rev                   | 5'- GTGGTAGTTTCGGGTGGATAAG -3'                                 |
